# Supplementary material for: Preparation of diazoalkane complexes of iron(ii)
Source: Royal Society of Chemistry journal article supplement (doi:10.1039/c6ra22051g), 2016-01-01
Supplement: c6ra22051g1.pdf [file c6ra22051g1.pdf]

SUPPLEMENTARY INFORMATION - G. Albertin *et al.*, Preparation of Diazoalkane Complexes of Iron(II)

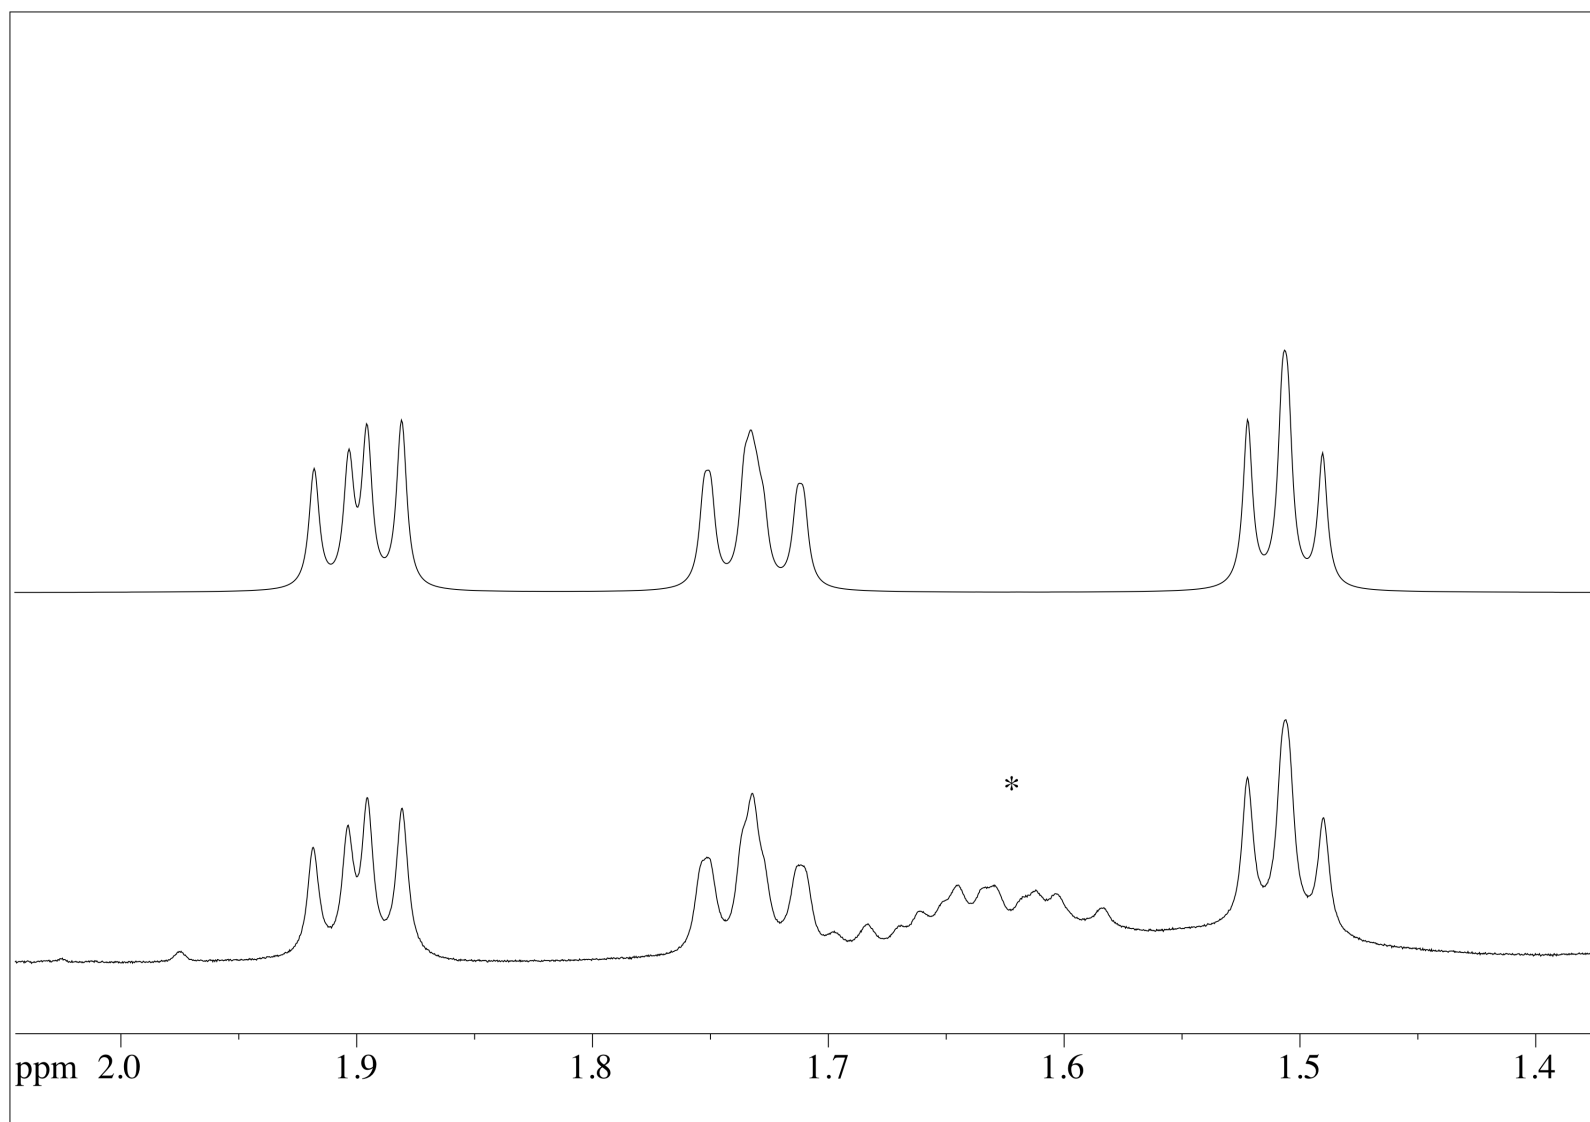

Fig. S1: <sup>1</sup>H NMR spectra of compound [Fe(η<sup>5</sup>-C<sub>5</sub>H<sub>5</sub>){N<sub>2</sub>C(C<sub>12</sub>H<sub>8</sub>)}(dppe)]BPh<sub>4</sub> (**1c**) at 295 K in CD<sub>2</sub>Cl<sub>2</sub>, pyrazole ligand hydrogens. Lower, experimental; upper, simulated (see parameters in Experimental section). The asterisk indicates an impurity.

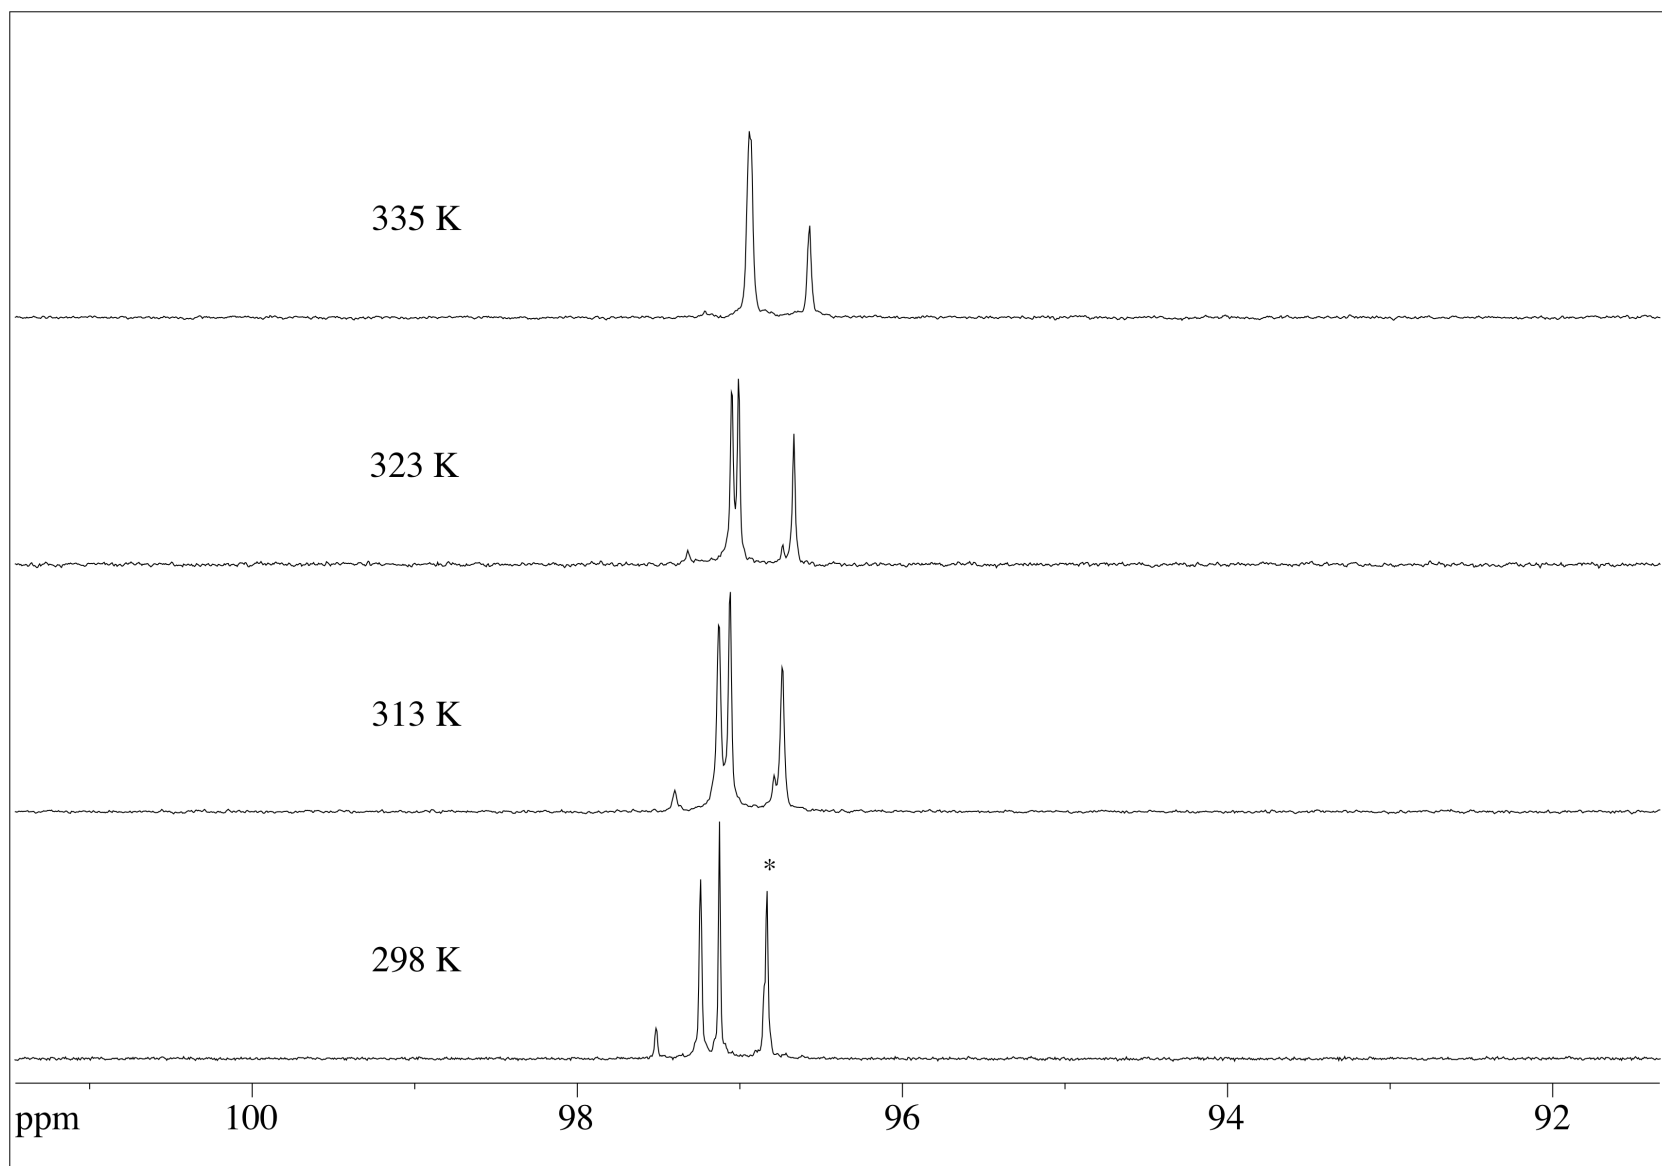

Fig. S2:  $^{31}\text{P}\{^1\text{H}\}$  NMR spectra of compound  $[\text{Fe}(\eta^5\text{-C}_5\text{H}_5)\{\text{N}=\text{NC}(\text{C}_{12}\text{H}_8)\text{CH}(\text{CN})\text{CH}_2\}(\text{dppp})\text{BPh}_4$  (**5**) in  $(\text{CD}_3)_2\text{CO}$  at variable temperatures. The asterisk indicates a known impurity (see text for explanation).
